# Supplementary material
Source: Research Square preprint supplement (doi:10.21203/rs.3.rs-10232688/v1)
Supplement: Supplementary file 1 [file bf8891df52a20a8fbb57f79c.docx]

Additional file 1. Data-charting and synthesis tables (Tables A1–A12)

| **Table A1:** Studies’ general description | | | | | | |
| --- | --- | --- | --- | --- | --- | --- |
| **Author(s)** | **Country/Region** | **Education Level** | **Children Age** | **Children Languages** | **Children no** | **Study design** |
| Becker & Knoll (2022) | Switzerland (German speaking) | Day care centre | Not specified | German (L1), English (L2), multiple home/heritage languages | Not specified | qualitative: focused ethnography |
| Engel de Abreu et al. (2025) | Luxembourg | Preschool | 4-5 years | Portuguese (L1), Luxembourgish (L2), German (L3) | 186 | quantitative: randomized controlled trial |
| Geiger-Jaillet & Schlemminger (2023) | France, Alsace | Kindergarten | 5-6 years | French (L1), German (L2), Alsatian dialect | 66 | qualitative: observational |
| Gkaintartzi & Katsara (2024) | Greece, south Greece | Preschool | 5-6 years | Greek (L1), English (L2) | 11 | qualitative: action research |
| Incognito et al. (2021) | Italy/Tuscany | Preschool | 4-5 years | Chinese and other minority/home languages (L1), Italian (L2), | 251 | quantitative: cluster-randomized controlled trial |
| Kirsch & Bergeron-Morin (2023) | Luxembourg | Day care centre | 2-4 years | Luxembourgish, German, French and other home languages (not clear L1 or L2) | 24 | qualitative: multiple case study / observational |
| Laursen & Daugaard (2025) | Denmark | Preschool | 5-6 years | Arabic, Dari, Pashto, Somali (L1), Danish (L2) | 5 | qualitative: micro-ethnographic case study |
| Lilja et al. (2025) | Sweden | Preschool | 3-5 years | 24 different languages (L1), Swedish (L2) | Not clear | mixed methods: implementation study |
| Lundberg et al. (2023) | Sweden | Preschool | 3-5 years | Swedish, multiple home languages | 61 | qualitative: ethographic |
| Rendón-Romero, Navarro-Pablo & García-Jiménez (2021) | Spain | Primary school | 6-7 years | Spanish (L1), English (L2) | 52 | quantitative: experimental pre-test/post-test with control group |
| Sundström et al. (2024) | Sweden | Preschool | 6-7 years | L1 (not mentioned), Swedish (L2) | 26 | quantitative: non-randomized pretest-posttest control group design |
| Uhl, Steinlen & Piske (2023) | Germany, Bavaria | Primary school | 7 years | German (L1), French (L2), diverse heritage languages | 186 | quantitative: comparative cross-sectional design |
| Verhagen et al. (2024) | Netherlands | ECEC | 2-4 years | Dutch and/or English exposed children, children from other language-homes | 584 | quantitative: longitudinal observational study |
| Voltmer et al. (2021) | Germany, Lower Saxony, Hamburg | Kindergarten | 2.75-5.5 years | German (monolingual) and DLL (other home languages not specified) | 281 | quantitative: quasi-experimental longitudinal study |
| Žefran, Bratož & Rutar (2025) | Slovenia | Kindergarten | 5-6 years | Italian, Slovenian (L1), Slovenian (L2), English (L3) | Not reported (3 child interviews) | mixed methods: programme evaluation |

| **Table A2** Theories, pedagogical approaches and targeted competence domain(s) | | | | | | | |
| --- | --- | --- | --- | --- | --- | --- | --- |
| **Study** | **Theory or theoretical framework** | **Pedagogical approach** | | | **Targeted competence domain(s)** | **Broader categorisation** | |
| Becker & Knoll (2022) | Translanguaging, code-switching, and language hierarchies / ideologies | Bilingual instructional language contexts | | | Participation / identity / agency | Translanguaging / plurilingual approaches | |
| Engel de Abreu et al. (2025) | Cross-language transfer facilitation models; Linguistic Interdependence Hypothesis; additive bilingualism | MOLLY (Mother-tongue Oral Language and Early Literacy for the Young) | | | Oral language; literacy / emergent literacy | Oral language / literacy intervention approaches | |
| Geiger-Jaillet & Schlemminger (2023) | Translanguaging practices | Immersion-based pedagogy | | | Metalinguistic / plurilingual awareness; oral language interaction | Translanguaging / plurilingual approaches | |
| Gkaintartzi & Katsara (2024) | Language Awareness (LA); Multilingual Awareness ; FREPA; Awakening to Languages (AtL) | Educational critical action research | | | Metalinguistic / plurilingual awareness; intercultural awareness / attitudes | Pluralistic / language-awareness approaches | |
| Incognito et al. (2021) | Comprehensive Emergent Literacy Model (CELM); Vygotskian Zone of Proximal Development (ZPD) | PASSI (Promoting the Achievement of Sound-Sign Integration) with an embedded-explicit approach | | | Literacy/emergent literacy | Literacy and emergent-literacy approaches | |
| Kirsch & Bergeron-Morin (2023) | Sociocultural learning theory; ecological system theory; translanguaging; communities of practice | Inclusive and participatory literacy practices using shared/dialogic reading | | | Literacy / emergent literacy; oral language; participation / inclusion | Home–ECEC collaboration approaches | |
| Laursen & Daugaard (2025) | Affect and Space theories; symbolic view of language ; metalanguaging | Dialog multilingual literacy | | | Metalinguistic / plurilingual awareness; participation / identity / agency | Translanguaging / plurilingual approaches | |
| Lilja et al. (2025) | Usage-based and socio-cognitive perspectives; Implementation Science | Explicit vs. Implicit narrative instruction | | | Oral language | Oral language / literacy intervention approaches | |
| Lundberg et al. (2023) | Bernstein’s Competence Model; translanguaging | Translanguaging pedagogy | | | Participation / identity / agency; Metalinguistic / plurilingual awareness | Translanguaging / plurilingual approaches | |
| Rendón-Romero, Navarro-Pablo & García-Jiménez (2021) | Phonics; phonological awareness; biliteracy transference | Phonics-based instruction (Jolly Phonics) | | | Literacy / emergent literacy | Literacy / emergent literacy approaches | |
| Sundström et al. (2024) | Vocabulary intervention; word learning perspective. | Small-group shared book reading with the Lexicon Pirate method | | | Oral language | Oral language / literacy intervention approaches | |
| Uhl, Steinlen & Piske (2023) | Instructed Second Language Acquisition (ISLA) and Processability Theory (PT) | CLIL (Content and Language Integrated Learning) | | | Oral language | Bilingual education / CLIL / exposure-based approaches | |
| Verhagen et al. (2024) | Exposure-based bilingual development; bilingual ECEC; dual-language development | Bilingual Early Childhood Education and Care (ECEC) models | | | Oral language | Bilingual education / CLIL / exposure-based approaches | |
| Voltmer et al. (2021) | Language support strategies (LSS);  Vygotskian social interactionism; neuropsychological preparedness and neural plasticity | FTT (Feeling, Thinking and Talking) | | | Oral language | Oral-language / literacy intervention approaches | |
| Žefran, Bratož & Rutar (2025) | Pluralistic approaches to language learning (FREPA) | Multilingual Kindergarten Model (Mu-Ki Koper / DivCo) | | | Metalinguistic/ plurilingual awareness; intercultural awareness | Pluralistic / language-awareness approaches | |
| **Table A3** Overview of multilingual practices | | | | | | | |
| **Study** | **Practice type** | | **Grouping format** | | **Duration / Frequency / session length** | **Veerman’s et al. (2026) categorisation: primary/secondary** | |
| Becker & Knoll (2022) | translanguaging interaction/activities; CLIL/bilingual programme activities | | whole class; small group | | School year program / ongoing / not clearly specified | Affirming / translanguaging based | |
| Engel de Abreu et al. (2025) | vocabulary intervention; language comparison activities; multimodal/multisensory activities | | small group | | 30-week program / 4 times per week / 20-30 min. | Scaffolding / affirming | |
| Geiger-Jaillet & Schlemminger (2023) | storytelling/narrative work; translanguaging interaction/activities; play/game-based tasks | | small group | | Not clearly specified / recurring activity / not clearly specified | translanguaging based / - | |
| Gkaintartzi & Katsara (2024) | language comparison activities; songs/rhymes/chants; play/game-based tasks; multimodal/multisensory activities | | whole class | | 4-week program / repeated daily / 30 min. | Cross-linguistic / affirming | |
| Incognito et al. (2021) | phonics/literacy instruction; play/game-based tasks; storytelling/narrative work; multimodal/multisensory activities | | whole class; small group; individual | | 12-week or 30-week program / weeklh / 1.5 h. | Scaffolding / - | |
| Kirsch & Bergeron-Morin (2023) | shared reading; storytelling/narrative work; translanguaging interaction/activities; parent-supported/joint literacy activity | | whole class; small group | | Not clearly specified / not clearly specified / not clearly specified | Affirming / translanguaging-based | |
| Laursen & Daugaard (2025) | storytelling/narrative work; language comparison activities; multimodal/multisensory activities | | small group | | One session / once / 45 min. | Cross-linguistic / affirming | |
| Lilja et al. (2025) | shared reading; storytelling/narrative work; narrative intervention | | small group | | 12-week program / 3 times per week / 15-20 min. | Scaffolding / - | |
| Lundberg et al. (2023) | translanguaging interaction/activities; arts/movement/drama; play/game-based tasks | | whole class; small group | | Not clearly specified / ongoing / not clearly specified | Translanguaging based / affirming | |
| Rendón-Romero, Navarro-Pablo & García-Jiménez (2021) | phonics/literacy instruction; songs/rhymes/chants; play/game-based tasks; multimodal/multisensory activities | | whole class | | 7-month program / 3 times per week / 45 min. | Scaffolding / cross-linguistic | |
| Sundström et al. (2024) | shared reading; dialogic reading; vocabulary intervention; play/game-based tasks | | small group | | 6-week program / 2 times per week / 20-30 min. | Scaffolding **/ -** | |
| Uhl, Steinlen & Piske (2023) | CLIL-type thematic activities; CLIL/bilingual programme activities | | whole class | | School year program / 4 to 6 times per week / 45 min. per session | Scaffolding / - | |
| Verhagen et al. (2024) | CLIL/bilingual programme activities; centre-based routine | | whole class | | Ongoing model (longitudinal study) / ongoing/ exposure-based not clearly specified | Scaffolding / - | |
| Voltmer et al. (2021) | dialogic reading; shared reading; teacher-mediated language support | | whole class; small group | | Not clearly specified / embedded in daily routines / not clearly specified | Scaffolding / - | |
| Žefran, Bratož & Rutar (2025) | songs/rhymes/chants; storytelling/narrative work; arts/movement/drama; multimodal/multisensory activities; language comparison activities | | whole class | | 10-month program / 2-3 times per week / 1-2h. | Affirming / cross-linguistic | |
| **Table A4** Overview of benefits, challenges, and reporting level of practices | | | | | | | | |
| **Study** | **Benefits** | | | **Challenges** | | | **Reporting level** | |
| Becker & Knoll (2022) | **Awareness / attitudinal gain**: broader use of English – German repertoires in interaction | | | Monolingual ideology / limited home-language inclusion: heritage languages largely excluded | | | classroom / pedagogical practice | |
| Engel de Abreu et al. (2025) | **Additive bilingualism / cross-linguistic transfer**: Portuguese gains (vocabulary, narrative skills, phonemic awareness, letter-sound knowledge) with some Luxembourgish transfer, no negative effects on German | | | Limited or uneven effects: no significant gains in German outcomes | | | pupil outcomes | |
| Geiger-Jaillet & Schlemminger (2023) | **Engagement / inclusion gains:** translanguaging supported meaning (German often functioned as a bridge toward Alsatian), making and participation (teachers privileged content and comprehensibility to sustain participation) | | | Implementation / interaction constraint: peer L2 / L3 use stayed limited and teacher – mediated | | | classroom interaction / pedagogy | |
| Gkaintartzi & Katsara (2024) | **Awareness / attitudinal gains**: greater language awareness, curiosity, openness to diversity, greater confidence to future language learning | | | Structural / contextual constraint: unfamiliar scripts and broader invisibility of multilingualism | | | pupil outcomes + contextual / pedagogical | |
| Incognito et al. (2021) | **Language / literacy gains**: stronger notational knowledge, with gap reduction after longer intervention | | | Limited or uneven effects: gains centered on notation, not phonological competence | | | pupil outcomes | |
| Kirsch & Bergeron-Morin (2023) | **Engagement / inclusion gains:** multilingual literacy with some parents as valued partners | | | Implementation / feasibility difficulty: parent involvement varied and was hard to sustain | | | pupil outcomes + parent/family + centre | |
| Laursen & Daugaard (2025) | **Awareness / attitudinal gains:** strong print engagement and rich metalanguaging around scripts | | | Mixed or minimal challenge reporting: findings foregrounded affordances more than barriers | | | pupil outcomes + classroom interaction | |
| Lilja et al. (2025) | **Engagement / inclusion gains:** both approaches helped (HINT/SCAN), especially for more reluctant children (SCAN) | | | Implementation / feasibility difficulty: declining fidelity, rigidity, and uncertainty in multilingual use, limited translanguaging in practice | | | educator / implementation + pupil | |
| Lundberg et al. (2023) | **Engagement / inclusion gains:** translanguaging spaces supported agency, identity, and learning across different socioeconomic settings | | | Monolingual ideology / limited home-language inclusion: educators’ ongoing tension between promoting Swedish and recognising multilingualism, multilingual and monolingual norms remained intertwined in practice | | | Classroom / pedagogical practice | |
| Rendón-Romero, Navarro-Pablo & García-Jiménez (2021) | **Language / literacy gains:** phonics improved phonological awareness and early reading in both languages (English – Spanish) | | | Mixed or minimal challenge reporting: few direct practice-related challenges reported | | | pupil outcomes | |
| Sundström et al. (2024) | **Language / literacy gains:** improved trained and untrained word knowledge, positive cross-linguistic transfer | | | Limited or uneven effects: no gains in semantic fluency or semantic relations | | | pupil outcomes + implementation/context | |
| Uhl, Steinlen & Piske (2023) | **Language / literacy gains:** productive L2 French grammar development, sustained attention positively associated with grammar performance | | | Limited or uneven effects: regular programme outperformed bilingual / CLIL at this stage | | | pupil outcomes / programme level | |
| Verhagen et al. (2024) | **Additive bilingualism / cross-linguistic transfer**: more English exposure boosted English without negative effects on Dutch | | | Mixed or minimal challenge reporting: Dutch growth showed no clear added effect from extra Dutch exposure | | | pupil outcomes | |
| Voltmer et al. (2021) | **Language / literacy gains:** teacher training improved sentence-level language processing | | | Limited or uneven effects: some measures remained unaffected (i.e., vocabulary, short-term memory/pseudowords span), large group was demanding | | | pupil outcomes + education intervention | |
| Žefran, Bratož & Rutar (2025) | **Awareness / attitudinal gains:** positive language awareness, interest, and enthusiastic participation | | | Structural / contextual constraint: effectiveness relied mainly on participant perceptions | | | pupil + teacher + parent outcomes / programme | |

| **Table A5** Storytelling, narrative work, shared reading and dialogic reading as bridging practices | | | | | | | |
| --- | --- | --- | --- | --- | --- | --- | --- |
| **Discussion pattern** | **Studies** | **RQ1 broader categorisation** | **Practice type from RQ2** | **Pedagogical framing** | **Competence domain(s) from RQ1** | **Grouping format** | **Veerman et al. primary/secondary** |
| Storytelling/narrative work appears in translanguaging and plurilingual approaches. | Geiger-Jaillet & Schlemminger (2023); Laursen & Daugaard (2025) | Translanguaging / plurilingual approaches | Storytelling/narrative work; translanguaging interaction; language comparison; multimodal/multisensory activities | Used flexibly for multilingual meaning-making, metalinguistic awareness and participation | Metalinguistic/plurilingual awareness; oral interaction; participation/identity/agency | Small group | Translanguaging-based / -; Cross-linguistic / affirming |
| Shared reading and narrative work appear in oral-language/literacy intervention approaches. | Lilja et al. (2025); Sundström et al. (2024); Voltmer et al. (2021) | Oral language / literacy intervention approaches | Shared reading; dialogic reading; storytelling/narrative work; narrative intervention; teacher-mediated language support | Used in a more structured way to support vocabulary, narrative competence, sentence-level language and oral-language development | Oral language; literacy/emergent literacy | Mostly small group; whole class/small group in Voltmer et al. | Scaffolding / - |
| Storytelling also appears in structured emergent-literacy intervention. | Incognito et al. (2021) | Literacy / emergent-literacy approaches | Storytelling/narrative work; phonics/literacy instruction; play/game-based tasks; multimodal activities | Embedded in literacy instruction to support notational and emergent-literacy development | Literacy/emergent literacy | Whole class; small group; individual | Scaffolding / - |
| Shared reading connects literacy, multilingual inclusion and family participation. | Kirsch & Bergeron-Morin (2023) | Home-ECEC collaboration approaches | Shared reading; storytelling/narrative work; translanguaging interaction; parent-supported/joint literacy activity | Used as inclusive and participatory literacy practice involving educators, parents, children and home languages | Literacy/emergent literacy; oral language; participation/inclusion | Whole class; small group | Affirming / translanguaging-based |
| Storytelling also appears in pluralistic/language-awareness pedagogy. | Žefran, Bratož & Rutar (2025) | Pluralistic / language-awareness approaches | Storytelling/narrative work; songs/rhymes/chants; arts/movement/drama; multimodal activities; language comparison | Used to foster curiosity, multilingual awareness, intercultural openness and positive attitudes | Metalinguistic/plurilingual awareness; intercultural awareness | Whole class | Affirming / cross-linguistic |

| **Table A6** Play, games, songs, movement, drama and multimodal practices as developmentally appropriate pedagogy | | | | | | |
| --- | --- | --- | --- | --- | --- | --- |
| **Discussion pattern** | **Studies** | **RQ1 broader categorisation** | **Practice type from RQ2** | **Why this supports the discussion point** | **Grouping format** | **Veerman et al. primary/secondary** |
| Play and games are used to make multilingual learning age-appropriate and interactive. | Geiger-Jaillet & Schlemminger (2023); Gkaintartzi & Katsara (2024); Incognito et al. (2021); Lundberg et al. (2023); Rendón-Romero et al. (2021); Sundström et al. (2024) | Translanguaging / plurilingual; pluralistic/language-awareness; literacy/emergent-literacy; oral-language/literacy intervention | Play/game-based tasks | Shows that multilingual practices for ages 3-7 are often embedded in playful interaction rather than formal instruction only | Whole class; small group; individual depending on study | Translanguaging-based; cross-linguistic; scaffolding |
| Songs, rhymes and chants support embodied and memorable language exposure. | Gkaintartzi & Katsara (2024); Rendón-Romero et al. (2021); Žefran et al. (2025) | Pluralistic/language-awareness; literacy/emergent-literacy | Songs/rhymes/chants | Shows the use of rhythmic, oral and affective practices to support language awareness and early literacy | Whole class | Cross-linguistic / affirming; scaffolding / cross-linguistic; affirming / cross-linguistic |
| Arts, movement and drama create participatory and embodied multilingual learning spaces. | Lundberg et al. (2023); Žefran et al. (2025) | Translanguaging / plurilingual; pluralistic/language-awareness | Arts/movement/drama | Shows that multilingual education also involves identity, agency, creativity and embodied participation | Whole class; small group | Translanguaging-based / affirming; affirming / cross-linguistic |
| Multimodal and multisensory activities are widely used across several approaches. | Engel de Abreu et al. (2025); Gkaintartzi & Katsara (2024); Incognito et al. (2021); Laursen & Daugaard (2025); Rendón-Romero et al. (2021); Žefran et al. (2025) | Oral-language/literacy intervention; pluralistic/language-awareness; literacy/emergent-literacy; translanguaging/plurilingual | Multimodal/multisensory activities | Shows that visual, material, embodied and sensory support is central to multilingual pedagogy for young learners | Whole class; small group; individual depending on study | Scaffolding; cross-linguistic; affirming |

| **Table A7** Language comparison and multimodal activities as routes to metalinguistic and plurilingual awareness | | | | | | | |
| --- | --- | --- | --- | --- | --- | --- | --- |
| **Discussion pattern** | **Studies** | **RQ1 broader categorisation** | **Practice type from RQ2** | **What children are invited to do** | **Main competence domain(s)** | **Grouping format** | **Veerman et al. primary/secondary** |
| Language comparison supports metalinguistic and plurilingual awareness. | Engel de Abreu et al. (2025) | Oral language / literacy intervention approaches | Language comparison; vocabulary intervention; multimodal activities | Compare or connect languages within a heritage-language intervention | Oral language; literacy/emergent literacy | Small group | Scaffolding / affirming |
| Language comparison is central to Awakening to Languages / language-awareness work. | Gkaintartzi & Katsara (2024) | Pluralistic / language-awareness approaches | Language comparison; songs/rhymes/chants; play; multimodal activities | Explore multiple languages, scripts, sounds or words | Metalinguistic/plurilingual awareness; intercultural awareness/attitudes | Whole class | Cross-linguistic / affirming |
| Language comparison can emerge through children’s engagement with written signs. | Laursen & Daugaard (2025) | Translanguaging / plurilingual approaches | Storytelling/narrative work; language comparison; multimodal/multisensory activities | Compare written signs and discuss language forms through metalanguaging | Metalinguistic/plurilingual awareness; participation/identity/agency | Small group | Cross-linguistic / affirming |
| Phonics can involve cross-language transfer between literacy systems. | Rendón-Romero et al. (2021) | Literacy / emergent-literacy approaches | Phonics/literacy instruction; songs/rhymes/chants; play; multimodal activities | Work with sound-letter links and biliteracy transfer | Literacy/emergent literacy | Whole class | Scaffolding / cross-linguistic |
| Language comparison is also used in pluralistic kindergarten models. | Žefran et al. (2025) | Pluralistic / language-awareness approaches | Language comparison; storytelling; songs/rhymes/chants; arts/movement/drama; multimodal activities | Notice and compare languages/cultures through varied activities | Metalinguistic/plurilingual awareness; intercultural awareness | Whole class | Affirming / cross-linguistic |

| **Table A8** Grouping format, practice aim and pedagogical orientation | | | | | |
| --- | --- | --- | --- | --- | --- |
| **Discussion pattern** | **Grouping format** | **Studies** | **Practice types** | **Pedagogical interpretation** | **RQ1 connection** |
| Small-group arrangements are used where closer interaction, targeted support or focused participation is required. | Small group | Engel de Abreu et al. (2025); Geiger-Jaillet & Schlemminger (2023); Laursen & Daugaard (2025); Lilja et al. (2025); Sundström et al. (2024) | Vocabulary intervention; heritage-language intervention; narrative intervention; storytelling; language comparison; shared/dialogic reading | Small groups allow more adult-child interaction, scaffolding and participation | Mainly oral-language/literacy intervention and translanguaging/plurilingual approaches |
| Whole-class arrangements are common in classroom-based multilingual awareness, CLIL, phonics and programme-level activities. | Whole class | Gkaintartzi & Katsara (2024); Rendón-Romero et al. (2021); Uhl et al. (2023); Verhagen et al. (2024); Žefran et al. (2025) | Language comparison; songs/rhymes/chants; phonics; CLIL/bilingual programme activities; centre-based routines | Whole-class formats support exposure, shared routines and collective language-awareness work | Pluralistic/language-awareness; bilingual/CLIL; literacy/emergent literacy |
| Combined whole-class and small-group formats appear in interaction-rich and routine-embedded practices. | Whole class + small group | Becker & Knoll (2022); Kirsch & Bergeron-Morin (2023); Lundberg et al. (2023); Voltmer et al. (2021) | Translanguaging interaction; shared/dialogic reading; parent-supported literacy; arts/movement/drama; teacher-mediated support | Combination allows both collective participation and more focused interaction | Translanguaging/plurilingual; home-ECEC collaboration; oral-language/literacy intervention |
| Multi-format organisation appears in more formally structured intervention designs. | Whole class + small group + individual | Incognito et al. (2021) | Phonics/literacy instruction; storytelling; play; multimodal activities | Multiple formats reflect structured implementation and assessment needs | Literacy/emergent-literacy approach |

| **Table A8** Integrated synthesis linking RQ1, RQ2, RQ3 benefits and challenges, and reporting level | | | | | | |
| --- | --- | --- | --- | --- | --- | --- |
| **Broad grouping in final discussion** | **Table 6 benefit category** | **RQ1 links** | **RQ2 links** | **Main RQ3 benefits** | **Main cautions / challenges** | **Studies and typical reporting level** |
| Linguistic development outcomes | Language / literacy gains | Literacy/emergent-literacy, oral-language/literacy intervention, and bilingual education/CLIL orientations; targeted measurable competences. | Structured literacy, PASSI, phonics, vocabulary intervention, CLIL-type grammar development, shared/dialogic reading, teacher-mediated language support. | Domain-specific gains in notational knowledge, phonological awareness, early reading-related skills, vocabulary, productive L2 grammar, and sentence-level processing. | Effects often limited to targeted domains; transfer to broader competences not always evident; exposure, dosage, scaffolding and implementation conditions mattered. | Incognito et al. (2021); Rendón-Romero et al. (2021); Sundström et al. (2024); Uhl et al. (2023); Voltmer et al. (2021). Mostly pupil outcomes. |
| Linguistic development outcomes | Additive bilingualism / cross-linguistic transfer | Cross-language transfer, Linguistic Interdependence Hypothesis, additive bilingualism, exposure-based bilingual development, bilingual ECEC models. | Structured heritage-language oral-language intervention and bilingual ECEC exposure-based routines. | Development in an additional or heritage language without compromising the majority/school language; Portuguese and English gains; some transfer to Luxembourgish; no negative effects on German or Dutch. | Effects varied across languages and outcome measures; German outcomes did not improve significantly in Engel de Abreu et al.; extra Dutch exposure did not clearly enhance Dutch growth in Verhagen et al. | Engel de Abreu et al. (2025); Verhagen et al. (2024). Mostly pupil outcomes / bilingual vocabulary growth. |
| Awareness, attitudes, engagement and inclusion | Awareness / attitudinal gains | Translanguaging/plurilingual and pluralistic/language-awareness frameworks; metalinguistic/plurilingual awareness, intercultural awareness and attitudes. | Language comparison, songs, rhymes, chants, storytelling, arts, movement, drama, multilingual artefacts, scripts/signs, multimodal and multisensory activities. | Increased language awareness, curiosity, openness to linguistic diversity, positive attitudes, print engagement, metalanguage/metalanguaging, and enthusiastic participation. | Difficult to evaluate through conventional measures; some evidence qualitative, perception-based, or context-specific; sustainability depends on curricular and institutional support. | Becker & Knoll (2022); Gkaintartzi & Katsara (2024); Laursen & Daugaard (2025); Žefran et al. (2025). Classroom/pedagogical practice, pupil interaction, and programme perceptions. |
| Awareness, attitudes, engagement and inclusion | Engagement / inclusion gains | Translanguaging, sociocultural, ecological, affective, and socio-cognitive perspectives; participation, identity, agency, oral language, literacy/emergent literacy and plurilingual awareness. | Translanguaging interaction, shared reading, storytelling, parent-supported literacy activity, narrative work, and multimodal meaning-making. | Participation, agency, confidence, identity affirmation, inclusion, home-language validation, and positioning of children as competent multilingual contributors. | Home languages may remain marginal or symbolic; parent participation and translanguaging can be difficult to sustain; educator confidence and institutional framing are crucial. | Geiger-Jaillet & Schlemminger (2023); Kirsch & Bergeron-Morin (2023); Lilja et al. (2025); Lundberg et al. (2023). Classroom interaction, pedagogy, educator implementation, pupil/parent/family levels. |

| **Table A9** Four benefit categories used in the final RQ3 discussion | | | |
| --- | --- | --- | --- |
| **Table 6 benefit category** | **Reported benefit in the final discussion** | **Typical evidence / reporting level** | **Relevant studies** |
| Language / literacy gains | Notational knowledge; phonological awareness; early reading-related skills; vocabulary; productive L2 grammar; sentence-level language processing. | Primarily pupil outcomes measured through tests or structured assessments. | Incognito et al. (2021); Rendón-Romero et al. (2021); Sundström et al. (2024); Uhl et al. (2023); Voltmer et al. (2021) |
| Additive bilingualism / cross-linguistic transfer | Support for additional or heritage language development without compromising majority/school language development; cross-language transfer or no negative effects. | Primarily pupil outcomes and bilingual vocabulary/language growth measures. | Engel de Abreu et al. (2025); Verhagen et al. (2024) |
| Awareness / attitudinal gains | Language awareness; curiosity about languages; openness to linguistic diversity; positive attitudes; print engagement; metalanguage/metalanguaging; enthusiastic participation. | Classroom/pedagogical practice, pupil interaction, classroom observations, interviews, participant or programme perceptions. | Becker & Knoll (2022); Gkaintartzi & Katsara (2024); Laursen & Daugaard (2025); Žefran et al. (2025) |
| Engagement / inclusion gains | Participation; agency; confidence; identity; inclusion; home-language validation; recognition of children’s multilingual repertoires. | Classroom interaction/pedagogy, educator implementation, pupil engagement, parent/family participation, centre/programme-level reporting. | Geiger-Jaillet & Schlemminger (2023); Kirsch & Bergeron-Morin (2023); Lilja et al. (2025); Lundberg et al. (2023) |

| **Table A10** Cross-cutting challenges across the four benefits categories. | | | |
| --- | --- | --- | --- |
| **Cross-cutting challenge in final discussion** | **How it appears across categories** | **Reporting level most often involved** | **Studies** |
| Limited or uneven effects | Benefits were often restricted to directly targeted outcomes and did not necessarily generalise to broader language/literacy or majority-language measures. | Mostly pupil outcomes. | Engel de Abreu et al. (2025); Incognito et al. (2021); Sundström et al. (2024); Uhl et al. (2023); Voltmer et al. (2021) |
| Implementation and feasibility | Practices required sustained professional support, time, resources, clear pedagogical objectives, fidelity, and appropriate adaptation to classroom realities. | Educator/implementation; classroom/pedagogical practice; pupil outcomes where implementation affected measured effects. | Geiger-Jaillet & Schlemminger (2023); Kirsch & Bergeron-Morin (2023); Lilja et al. (2025); Voltmer et al. (2021) |
| Monolingual ideology and limited home-language inclusion | Translanguaging, multilingual artefacts, home-language activities, or parent-supported literacy did not automatically guarantee equitable language inclusion. | Classroom/pedagogical practice; classroom interaction; educator implementation; family/centre level. | Becker & Knoll (2022); Lundberg et al. (2023); Lilja et al. (2025) |
| Structural, contextual, and methodological constraints | Awareness, attitudes, identity, and inclusion were harder to evaluate with conventional measures and were often documented through qualitative or perception-based evidence. | Classroom observations, interviews, interactional data, pupil/teacher/parent perceptions, programme-level reporting. | Gkaintartzi & Katsara (2024); Laursen & Daugaard (2025); Žefran et al. (2025) |

| **Table A11**  Study-level matrix linking RQ1, RQ2, RQ3 category, challenges category, and reporting level | | | | | |
| --- | --- | --- | --- | --- | --- |
| **Study** | **RQ1 orientation / competence focus** | **RQ2 practice type(s)** | **Table 6 benefit category** | **Main challenge category** | **Reporting level** |
| Becker & Knoll (2022) | Translanguaging, code-switching, language hierarchies/ideologies; awareness, participation, language use. | Bilingual daycare language practices in German-English institutional contexts. | Awareness / attitudinal gains | Monolingual ideology / limited home-language inclusion. | Classroom / pedagogy. |
| Engel de Abreu et al. (2025) | Heritage-language oral-language and early-literacy intervention; additive bilingualism; cross-language transfer. | Structured Portuguese heritage-language oral-language intervention. | Additive bilingualism / cross-linguistic transfer | Limited / uneven effects: no significant gains in German outcomes. | Pupil outcomes. |
| Geiger-Jaillet & Schlemminger (2023) | Translanguaging practices in immersion-based pedagogy; participation and meaning-making. | Translanguaging interaction, storytelling, games, immersion activities. | Engagement / inclusion gains | Implementation / feasibility: peer L2/L3 use limited and teacher-mediated. | Classroom interaction / pedagogy. |
| Gkaintartzi & Katsara (2024) | Awakening to Languages; language awareness; pluralistic approaches; intercultural awareness/attitudes. | Language comparison; multilingual songs, greetings, scripts and creative activities. | Awareness / attitudinal gains | Structural/contextual constraints: unfamiliar scripts and invisibility of multilingualism. | Pupil / contextual / pedagogical. |
| Incognito et al. (2021) | Emergent literacy; notational knowledge; embedded-explicit instruction. | PASSI sound-sign integration intervention. | Language / literacy gains | Limited / uneven effects: gains centred on notational knowledge rather than phonological competence. | Pupil outcomes. |
| Kirsch & Bergeron-Morin (2023) | Sociocultural and ecological learning; translanguaging; communities of practice; home-ECEC collaboration. | Shared/dialogic reading; parent-supported multilingual literacy; home-ECEC collaboration. | Engagement / inclusion gains | Implementation / feasibility: parent involvement varied and was hard to sustain. | Pupil + parent/family + centre. |
| Laursen & Daugaard (2025) | Affect, space, symbolic language, and metalanguaging; awareness and print engagement. | Multilingual artefacts; home-written words; group conversation around scripts/signs. | Awareness / attitudinal gains | Mixed/minimal challenge reporting; affordances foregrounded more than barriers. | Pupil + classroom interaction. |
| Lilja et al. (2025) | Narrative instruction; usage-based and socio-cognitive perspectives; implementation science. | Explicit and implicit narrative instruction; shared reading and structured narrative work. | Engagement / inclusion gains | Implementation / feasibility: declining fidelity, rigidity, uncertainty in multilingual use, limited translanguaging. | Educator / implementation + pupil. |
| Lundberg et al. (2023) | Translanguaging and Bernstein’s competence model; agency and identity. | Everyday translanguaging pedagogy; educators inviting children’s linguistic expertise. | Engagement / inclusion gains | Monolingual ideology / limited home-language inclusion: tension between Swedish and multilingualism. | Classroom / pedagogical practice. |
| Rendón-Romero et al. (2021) | Phonics, phonological awareness, biliteracy and early reading-related skills. | Phonics-based instruction using Jolly Phonics. | Language / literacy gains | Mixed/minimal challenge reporting; broader multilingual competences less central. | Pupil outcomes. |
| Sundström et al. (2024) | Vocabulary intervention and word-learning perspective. | Small-group shared book reading combined with Lexicon Pirate method. | Language / literacy gains | Limited / uneven effects: no effects on semantic fluency or semantic relations. | Pupil outcomes + implementation/context. |
| Uhl et al. (2023) | Instructed SLA, Processability Theory and CLIL; productive L2 French grammar. | CLIL and regular French programme comparison. | Language / literacy gains | Limited / uneven effects: regular programme outperformed bilingual/CLIL at this stage. | Pupil outcomes / programme level. |
| Verhagen et al. (2024) | Exposure-based bilingual development; bilingual ECEC models. | Dutch-English bilingual ECEC exposure. | Additive bilingualism / cross-linguistic transfer | Mixed/limited challenge: Dutch growth showed no clear added effect from extra Dutch exposure. | Pupil outcomes. |
| Voltmer et al. (2021) | Language support strategies; Vygotskian social interactionism; teacher-led language support. | FTT teacher training; language support in everyday conversations. | Language / literacy gains | Limited / uneven effects and implementation demands: some measures unaffected; large-group implementation demanding. | Pupil outcomes + education intervention. |
| Žefran et al. (2025) | Pluralistic approaches; FREPA; multilingual kindergarten model; language awareness and cultural curiosity. | Multilingual Kindergarten Model; age-appropriate language-awareness activities. | Awareness / attitudinal gains | Structural/contextual/methodological constraints: relied mainly on participant perceptions. | Pupil + teacher + parent outcomes / programme. |

| **Table A12**  Practice format as a mediator of reported benefits, challenges and reporting level. | | | | | |
| --- | --- | --- | --- | --- | --- |
| **RQ2 practice / format** | **Typical pedagogical function** | **Benefit categories most closely linked** | **Reporting level(s)** | **Main challenges / cautions** | **Representative studies** |
| Small-group targeted intervention | Focused support, adult-child interaction, responsive scaffolding and individualized participation. | Language/literacy gains; additive bilingualism/cross-linguistic transfer; engagement/inclusion in narrative work. | Mostly pupil outcomes; sometimes educator/implementation + pupil. | Requires staffing, time, fidelity and teacher preparation; may be difficult to scale. | Engel de Abreu et al. (2025); Lilja et al. (2025); Sundström et al. (2024) |
| Whole-class multilingual or exposure-based activities | Broad exposure, shared participation, classroom-level awareness and collective engagement. | Awareness/attitudinal gains; language/literacy gains; additive bilingualism/exposure-related outcomes. | Pupil outcomes; classroom/pedagogical practice; programme-level reporting. | Less individualized scaffolding; individual effects may be harder to detect. | Gkaintartzi & Katsara (2024); Rendón-Romero et al. (2021); Uhl et al. (2023); Verhagen et al. (2024); Žefran et al. (2025) |
| Shared/dialogic reading, storytelling and narrative work | Meaning-making through books, narratives, adult questioning, interaction and multimodal support. | Language/literacy gains; engagement/inclusion gains; home-language validation where parents/families are involved. | Pupil outcomes; classroom interaction; parent/family + centre; educator implementation. | Quality depends on interactional strategies, language choices, adult confidence and sustained implementation. | Kirsch & Bergeron-Morin (2023); Lilja et al. (2025); Sundström et al. (2024); Voltmer et al. (2021) |
| Translanguaging interaction and multilingual meaning-making | Use of children’s linguistic repertoires for communication, participation and identity expression. | Engagement/inclusion gains; awareness/attitudinal gains. | Classroom interaction / pedagogy; classroom / pedagogical practice; educator implementation. | Can be constrained by monolingual norms, teacher insecurity and unequal status of languages. | Becker & Knoll (2022); Geiger-Jaillet & Schlemminger (2023); Lundberg et al. (2023) |
| Language comparison and multilingual artefacts | Attention to scripts, signs, words, greetings, songs and cross-linguistic similarities/differences. | Awareness/attitudinal gains. | Classroom interaction; pupil/contextual/pedagogical; pupil/teacher/parent programme perceptions. | Long-term outcomes and transfer are difficult to measure; activities may remain project-based unless embedded. | Gkaintartzi & Katsara (2024); Laursen & Daugaard (2025); Žefran et al. (2025) |
| Parent-supported literacy activity | Bridging home and ECEC; bringing home languages into literacy events. | Engagement/inclusion gains; home-language validation; awareness/attitudinal gains where language diversity becomes visible. | Pupil + parent/family + centre. | Parent roles may be unequal or marginal; collaboration requires careful facilitation and shared purpose. | Kirsch & Bergeron-Morin (2023) |
